# Supplementary material
Source: publisher figshare collection journal article supplement (https://tandf.figshare.com/ndownloader/files/17916506)
Supplement: Supplementary file 1 [file 17916506]

**APPENDIX**

**Table A1.** Descriptive statistics and Kolmogorov-Smirnov test results for treatment combinations and measurement points

| **Treatment** | **Measurement Point** | **Speed [Km/h]** | | **Speed Reduction** | | | **KS-test** | |
| --- | --- | --- | --- | --- | --- | --- | --- | --- |
| Average | *SD* | | *VB* - *VT* [km/h] | (*VB* – *VT*)/*VB*  [%] | Statistic | *p* |
|  |  |  |  | |  |  |  |  |
| Baseline  Condition | -300 | 89.64 | 12.98 | | *VB* = speed in the  Baseline Condition  *VT* = speed in the Treatment Scenario | | .107 | .200 |
| -200 | 87.09 | 13.44 | | .104 | .200 |
| -100 | 83.31 | 14.35 | | .093 | .200 |
| B | 67.71 | 12.59 | | .071 | .200 |
| H | 65.25 | 11.03 | | .096 | .200 |
| E | 66.64 | 11.19 | | .122 | .181 |
|  |  |  |  | |  |  |  |  |
| Red Peripheral  Transverse Bars | -300 | 88.92 | 16.42 | | 0.72 | 0.80 | .107 | .200 |
| -200 | 79.91 | 17.20 | | 7.18 | 8.25 | .089 | .200 |
| -100 | 71.36 | 13.66 | | 11.95 | 14.34 | .077 | .200 |
| B | 59.70 | 10.62 | 8.01 | | 11.83 | .133 | .155 |
| H | 58.47 | 8.60 | 6.77 | | 10.38 | .104 | .200 |
| E | 60.66 | 9.30 | 5.98 | | 8.97 | .118 | .200 |
|  |  |  |  |  | |  |  |  |
| White Peripheral  Transverse Bars | -300 | 88.55 | 14.85 | 1.09 | | 1.22 | .099 | .200 |
| -200 | 82.19 | 16.34 | 4.90 | | 5.63 | .092 | .200 |
| -100 | 73.15 | 16.63 | 10.17 | | 12.20 | .082 | .200 |
| B | 62.18 | 11.36 | 5.54 | | 8.18 | .084 | .200 |
| H | 60.57 | 9.61 | 4.68 | | 7.17 | .082 | .200 |
| E | 61.92 | 10.51 | 4.71 | | 7.07 | .125 | .176 |
|  |  |  |  |  | |  |  |  |
| Optical  Speed Bars | -300 | 89.85 | 13.79 | -0.21 | | -0.24 | .084 | .200 |
| -200 | 84.51 | 14.73 | 2.59 | | 2.97 | .100 | .200 |
| -100 | 75.39 | 12.88 | 7.92 | | 9.51 | .073 | .200 |
| B | 65.05 | 9.55 | 2.66 | | 3.93 | .128 | .164 |
| H | 62.57 | 7.67 | 2.68 | | 4.11 | .117 | .200 |
| E | 63.75 | 7.43 | 2.88 | | 4.33 | .099 | .200 |
|  |  |  |  |  | |  |  |  |
| Chevrons | -300 | 89.58 | 17.56 | 0.06 | | 0.06 | .085 | .200 |
|  | -200 | 86.88 | 18.14 | 0.22 | | 0.25 | .108 | .200 |
|  | -100 | 80.60 | 18.25 | 2.71 | | 3.26 | .104 | .200 |
|  | B | 63.88 | 11.98 | 3.83 | | 5.65 | .099 | .200 |
|  | H | 62.42 | 10.20 | 2.83 | | 4.34 | .137 | .124 |
|  | E | 65.00 | 9.83 | 1.64 | | 2.46 | .097 | .200 |
|  |  |  |  |  | |  |  | | |  |
